# Supplementary material
Source: PubMed Central journal article supplement (PMC3843243)
Supplement: NIHMS520586-supplement-Supplemental_Fig_1.pdf [file NIHMS520586-supplement-Supplemental_Fig_1.pdf]

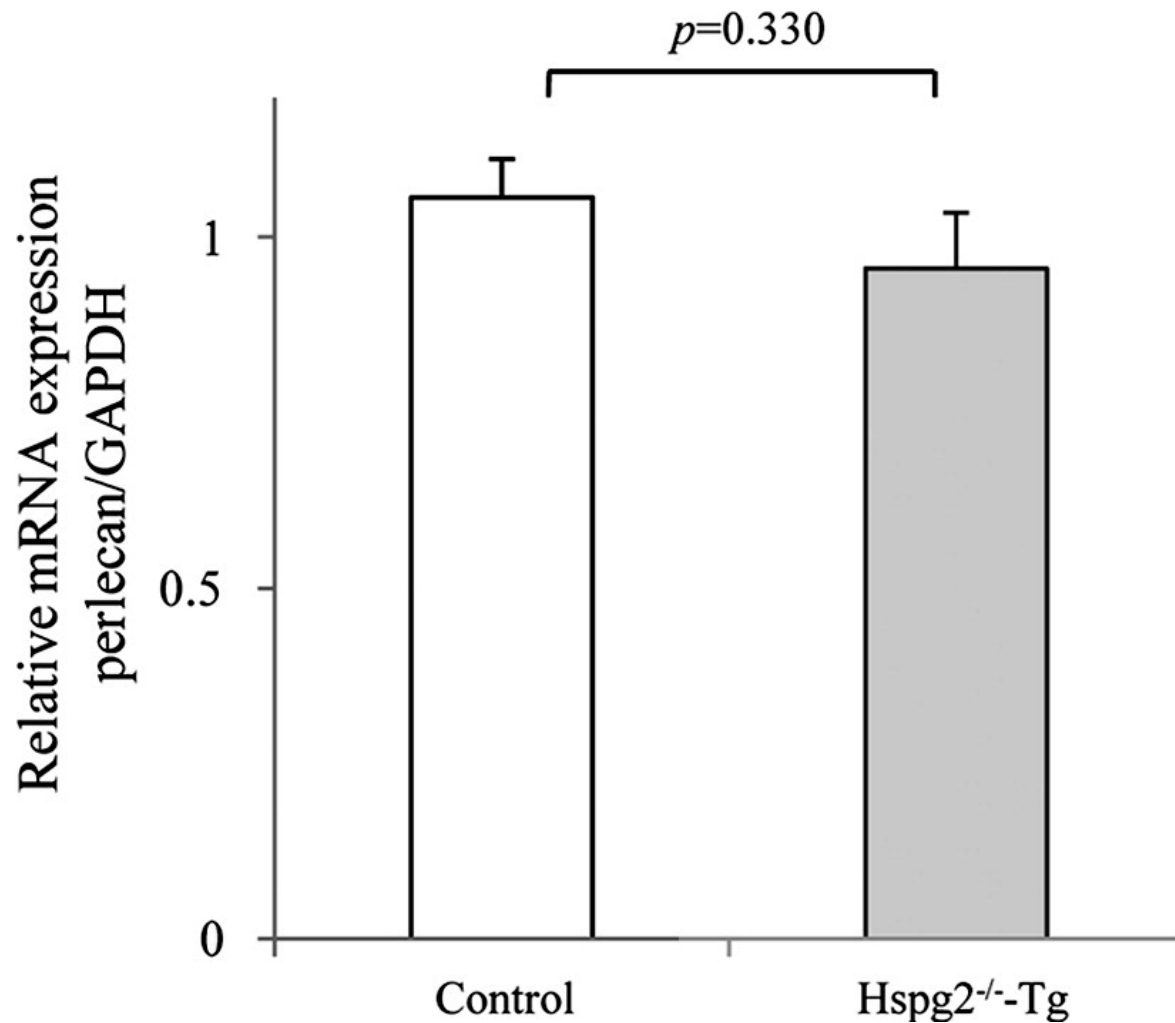

**Supplemental Fig. 1.** Perlecan mRNA expression in articular cartilage. Perlecan mRNA expression levels of articular cartilage were normalized to glyceraldehyde 3-phosphate dehydrogenase (GAPDH) by RT-PCR analysis. Perlecan mRNA expression levels of articular cartilage in Hspg2<sup>-/-</sup>-Tg mice were similar to those in control mice.
